# Supplementary material for: Integrative transcriptome analysis identifies deregulated microRNA-transcription factor networks in lung adenocarcinoma
Source: PubMed Central journal article supplement (PMC5045367; doi:10.18632/oncotarget.8713), 2016-04-12
Supplement: oncotarget-07-28920-s001.pdf [file oncotarget-07-28920-s001.pdf]

# Integrative transcriptome analysis identifies deregulated microRNA-transcription factor networks in lung adenocarcinoma

## Supplementary Material

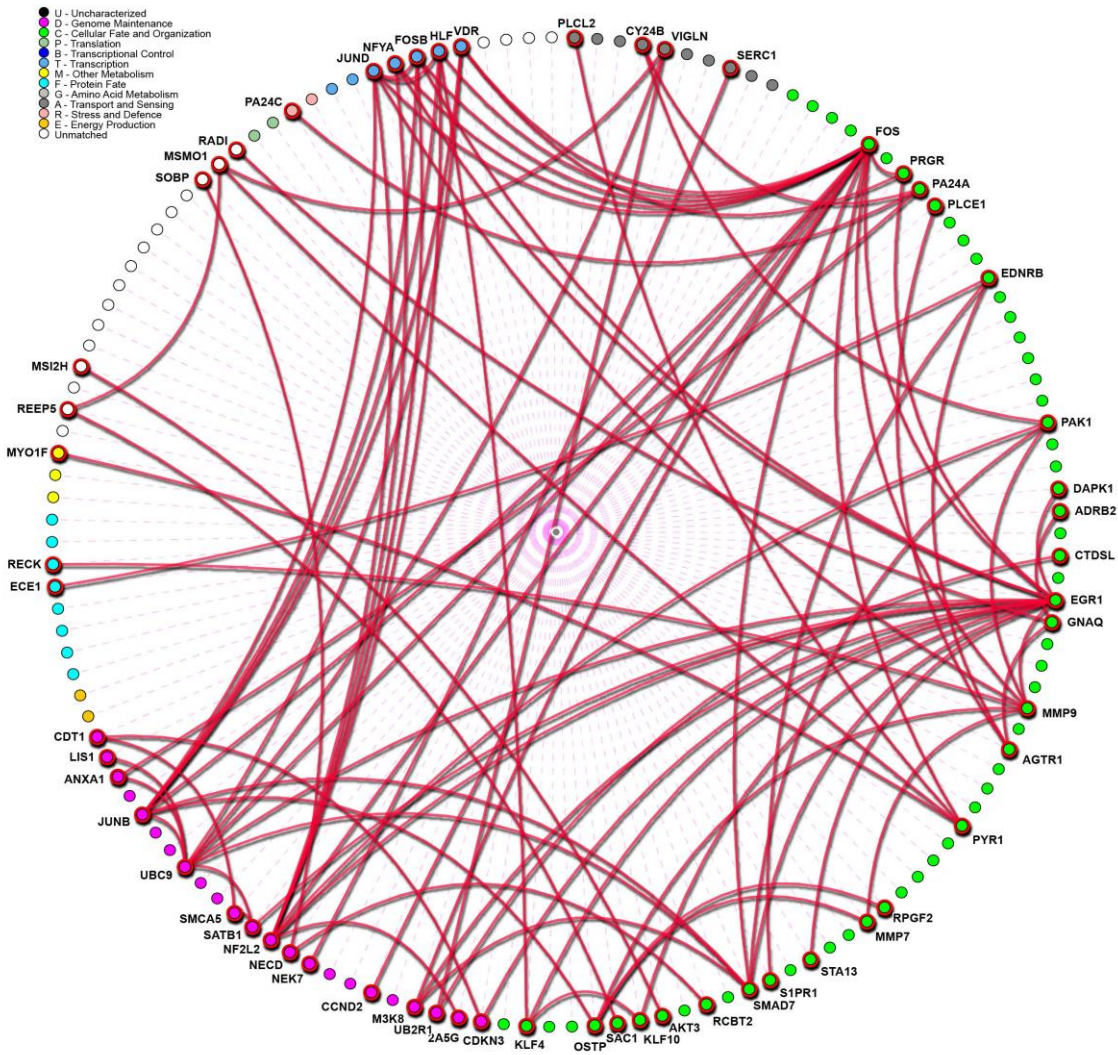

**Supplementary Figure 1. PPI-network of commonly deregulated genes in lung adenocarcinoma.** 148 genes (in circular layout), which have been consistently reported as deregulated in lung adenocarcinoma, and whose upstream neighborhood (order 2) is significantly enriched by differentially expressed miRNAs, were connected by PPIs ( $p < 0.001$ ; see PPI network analysis). 58 of these genes, which were directly connected ( $p = 0.044$ ) are labeled by their symbols. Network comprises 4,324 nodes in total, out of which 469 belong to lung cancer prognostic genes ( $p = 0.036$ ).

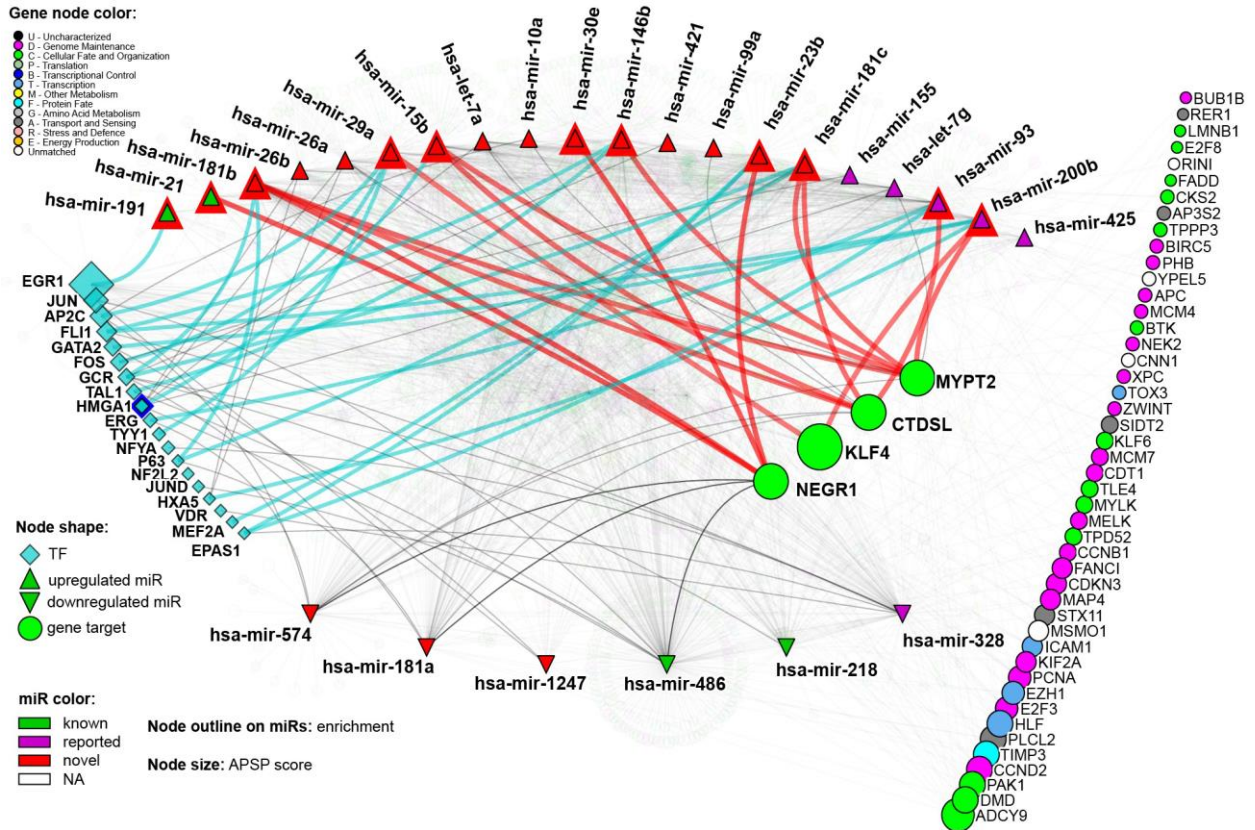

**Supplementary Figure 2. miRNA-TF-gene regulatory network.** Differentially expressed miRNAs whose downstream neighborhood is significantly enriched in deregulated genes ( $p < 0.05$ ), are highlighted. Among these, miRNAs miR-15b, miR-23b, miR-29a, miR-30e, miR-146b, miR-181b and miR-181c, have not been previously reported in lung adenocarcinoma compared to normal lung tissues from same patients (red color triangles). There are 705 genes that have been consistently reported as deregulated in tumors and whose upstream neighborhood is significantly enriched in differentially expressed miRNAs ( $p < 0.05$ ). 48 of these belong to lung cancer prognostic genes, ordered using an APSP score that measures centrality by calculating shortest paths among all nodes (right side). There are also 19 TFs whose upstream neighborhood is enriched by differentially expressed miRNAs ( $p < 0.05$ ); (list ordered based on APSP score on the left side), among which *HMGA1* (highlighted in blue) is a lung cancer prognostic gene.

**Supplemental Table 1: List of 148 deregulated genes in lung adenocarcinoma.**

| Official gene symbol<br>(hgnc_symbol) | uniprot_swissprot<br>ID |
|---------------------------------------|-------------------------|
| KLF4                                  | O43474                  |
| EGR1                                  | P18146                  |
| FOS                                   | P01100                  |
| PPP1R12B                              | O60237                  |
| NEGR1                                 | Q7Z3B1                  |
| SLC2A3                                | P11169                  |
| PHACTR2                               | O75167                  |
| PNRC2                                 | Q9NPJ4                  |
| PALLD                                 | Q8WX93                  |
| ADCY9                                 | O60503                  |
| RTKN2                                 | Q8IZC4                  |
| PTPRD                                 | P23468                  |
| CTDSPL                                | O15194                  |
| TFRC                                  | P02786                  |
| EDNRB                                 | P24530                  |
| FMO2                                  | Q99518                  |
| CBFA2T3                               | O75081                  |
| PPP2R5C                               | Q13362                  |
| DIXDC1                                | Q155Q3                  |
| PLCL2                                 | Q9UPR0                  |
| KLF10                                 | Q13118                  |
| AKT3                                  | Q9Y243                  |
| KLF9                                  | Q13886                  |
| PAK1                                  | Q13153                  |
| DMD                                   | P11532                  |
| HLF                                   | Q16534                  |
| CCND2                                 | P30279                  |
| MTMR9                                 | Q96QG7                  |
| STARD9                                | Q9P2P6                  |
| SLC1A1                                | P43005                  |
| SMAD7                                 | O15105                  |
| AGK                                   | Q53H12                  |
| FOSB                                  | P53539                  |
| TBX5                                  | Q99593                  |
| MRPS23                                | Q9Y3D9                  |
| SAMHD1                                | Q9Y3Z3                  |
| NEK7                                  | Q8TDX7                  |
| CCDC141                               | Q6ZP82                  |
| FRMD4B                                | Q9Y2L6                  |
| WIF1                                  | Q9Y5W5                  |
| KIAA1462                              | Q9P266                  |
| DOCK4                                 | Q8N110                  |
| WASF3                                 | Q9UPY6                  |
| EPB41L3                               | Q9Y2J2                  |

|          |        |
|----------|--------|
| RAPGEF2  | Q9Y4G8 |
| PCDH17   | O14917 |
| TRAK2    | O60296 |
| OSBPL2   | Q9H1P3 |
| CHL1     | O00533 |
| METAP1   | P53582 |
| HDLBP    | Q00341 |
| STEAP3   | Q658P3 |
| ARHGEF3  | Q9NR81 |
| KL       | Q9UEF7 |
| RMI2     | Q96E14 |
| PAFAH1B1 | P43034 |
| S1PR1    | P21453 |
| STARD13  | Q9Y3M8 |
| SVEP1    | Q4LDE5 |
| DLC1     | Q96QB1 |
| MMP9     | P14780 |
| MTX2     | O75431 |
| PLA2G4A  | P47712 |
| RCBTB2   | O95199 |
| B3GNT1   | O43505 |
| ACYP1    | P07311 |
| SERINC1  | Q9NRX5 |
| SLC7A5   | Q01650 |
| SESN1    | Q9Y6P5 |
| FAM83A   | Q86UY5 |
| DAPK1    | P53355 |
| CDC34    | P49427 |
| MSMO1    | Q15800 |
| SSFA2    | P28290 |
| KLRF1    | Q9NZS2 |
| NTS      | P30990 |
| GYG2     | O15488 |
| AGTR1    | P30556 |
| KDEL3    | O43731 |
| RPGR     | Q92834 |
| KIF2A    | O00139 |
| HGF      | P14210 |
| GREM1    | O60565 |
| ADRB2    | P07550 |
| PLCE1    | Q9P212 |
| RECK     | O95980 |
| RDX      | P35241 |
| MFAP3L   | O75121 |
| ZNF423   | Q2M1K9 |
| NFE2L2   | Q16236 |
| CDKN3    | Q16667 |
| JUND     | P17535 |
| ABI3BP   | Q7Z7G0 |
| OSBPL11  | Q9BXB4 |

|            |        |
|------------|--------|
| SOBP       | A7XYQ1 |
| OTUD1      | Q5VV17 |
| DECR2      | Q9NU11 |
| SAPCD2     | Q86UD0 |
| SYT12      | Q8IV01 |
| HOXA5      | P20719 |
| MARC2      | Q969Z3 |
| JUNB       | P17275 |
| NFYA       | P23511 |
| MYO1F      | O00160 |
| UBE2I      | P63279 |
| MMP7       | P09237 |
| SPP1       | P10451 |
| ADAM28     | Q9UKQ2 |
| ECE1       | P42892 |
| CDT1       | Q9H211 |
| LZTFL1     | Q9NQ48 |
| GALNT2     | Q10471 |
| ACKR4      | Q9NPB9 |
| N4BP2L1    | Q5TBK1 |
| HMBS       | P08397 |
| MAP3K8     | P41279 |
| GLRX       | P35754 |
| COASY      | Q13057 |
| REEP5      | Q00765 |
| PGR        | P06401 |
| USP12      | O75317 |
| CYBB       | P04839 |
| SACM1L     | Q9NTJ5 |
| SATB1      | Q01826 |
| MSI2       | Q96DH6 |
| CAD        | P27708 |
| TMED3      | Q9Y3Q3 |
| CLDN4      | O14493 |
| CLCN7      | P51798 |
| ANXA1      | P04083 |
| GNG11      | P61952 |
| HSD17B6    | O14756 |
| FNBP1      | Q96RU3 |
| METTL21B   | Q96AZ1 |
| DOCK6      | Q96HP0 |
| SMG5       | Q9UPR3 |
| PALMD      | Q9NP74 |
| AIFM1      | O95831 |
| PLA2G4C    | Q9UP65 |
| ST6GALNAC5 | Q9BVH7 |
| SMARCA5    | O60264 |
| VDR        | P11473 |
| GNAQ       | P50148 |
| SLC16A3    | O15427 |

|         |        |
|---------|--------|
| NDN     | Q99608 |
| HHIP    | Q96QV1 |
| MIS18A  | Q9NYP9 |
| SLC52A2 | Q9HAB3 |

**Supplemental Table 2:** Summary of miRNA datasets in lung adenocarcinoma.

| <b>Histology</b> | <b>Number of samples<br/>(tumor/normal)</b> | <b>Author</b>         |
|------------------|---------------------------------------------|-----------------------|
| <b>ADC, SCC</b>  | 104/104                                     | Yanaihara et al. 2006 |
| <b>ADC</b>       | 20/10                                       | Cho et al. 2009       |
| <b>ADC</b>       | 20/8                                        | Crawford et al. 2009  |
| <b>ADC</b>       | 112/56                                      | Jang et al. 2012      |
| <b>ADC</b>       | 40/20                                       | Yu et al. 2010        |
| <b>ADC</b>       | 12/6                                        | Dacic et al. 2010     |
| <b>ADC, SCC</b>  | 12/6                                        | Lee et al. 2011       |
| <b>ADC, SCC</b>  | 216/108                                     | Ma et al. 2014        |

Note, if multiple histologies were studied, only miRNAs clearly stated as differentially expressed in adenocarcinoma as compared to normal tissue, were taken into consideration.  
Reference citations in supplemental methods file.

**Supplemental Table 3:** Summary of gene expression datasets in lung adenocarcinoma.

| <b>Platform</b> | <b>Histology</b> | <b>Number of samples</b> | <b>Author</b>                                    |
|-----------------|------------------|--------------------------|--------------------------------------------------|
| Hu6800          | ADC              | 96/10                    | Beer et al. 2002                                 |
| HG-U95Av2       | ADC              | 228/17                   | Bhattacharjee et al. 2001                        |
| HG-U133p2       | ADC, SCC, LCC    | 156/64                   | Hou et al. 2010                                  |
| HG-U133a        | ADC              | 107/50                   | Landi et al. 2008                                |
| HG-U133p2       | ADC              | 246/20                   | Okayama et al. 2012                              |
| HG-Focus        | ADC, SCC         | 25/5                     | Rohrbeck et al. 2008                             |
| HG-U95Av2       | ADC              | 39/19                    | Stearman et al. 2005                             |
| HG-U133a        | ADC              | 54/27                    | Su et al. 2007                                   |
| HG-U133a        | ADC              | 50/20                    | *Girard et al. Unpublished data<br>GEO: GSE31547 |
| HG-U133a        | ADC              | 58/9                     | Yu et al. 2005                                   |

Note, datasets containing multiple cancer types were reduced to adenocarcinoma samples and paired normal tissue samples only. Samples from other cancer types were excluded.

\*Data from Girard et al. were obtained from Gene Expression Omnibus Database (GEO) under given accession number.
